# Supplementary material for: Ecoepidemiology of Cutaneous Leishmaniasis Outbreak, Israel
Source: PubMed Central journal article supplement (PMC2603121; doi:10.3201/eid1409.071100), 2008-09
Supplement: 07-1100_Techapp-s1.pdf [file 07-1100_Techapp-s1.pdf]

## **Cutaneous Leishmaniasis questionnaire**

1. District Health Office \_\_\_\_\_
2. Date of notification to District Health Office \_\_\_/\_\_\_/\_\_\_
3. Name of reporting physician \_\_\_\_\_
4. Place of employment of reporting physician \_\_\_\_\_

### **Patient personal details**

Surname \_\_\_\_\_ Given name(s) \_\_\_\_\_ I.D. \_\_\_\_\_  
D.O.B. \_\_\_/\_\_\_/\_\_\_ Sex [1] Male [2] Female  
Nationality: [1] Jew [2] Non-Jew [3] Unknown Health insurance provider \_\_\_\_\_  
Occupation (children – record daytime placement): \_\_\_\_\_  
Current address: City/village/settlement \_\_\_\_\_  
Street \_\_\_\_\_ House no. \_\_\_\_\_

### **Clinical and laboratory information**

Date of appearance of first signs of the disease: \_\_\_/\_\_\_/\_\_\_  
Date of definitive diagnosis: \_\_\_/\_\_\_/\_\_\_

| <u>Site of lesion</u> | <u>Nature of lesion</u> | No. lesions ____ |
|-----------------------|-------------------------|------------------|
| Face [1] Yes [2] No   | Ulcer [1] Yes [2] No    |                  |
| Limbs [1] Yes [2] No  | Nodule [1] Yes [2] No   |                  |
| Other [1] Yes [2] No  | Other [1] Yes [2] No    |                  |
| If yes, specify _____ | If yes, specify _____   |                  |

Was a laboratory diagnosis made? [1] Yes [2] No [3] Do not know

If so, what were the results of the following tests? Please record as follows:

[1] Positive result [2] Negative result [3] Not carried out

| Test                           | Result | Date of test |
|--------------------------------|--------|--------------|
| 1. Direct smear                | [ ]    | __/__/__     |
| 2. Histologic examination      | [ ]    | __/__/__     |
| 3. Culture                     | [ ]    | __/__/__     |
| 4. Serology                    | [ ]    | __/__/__     |
| 5. <i>Leishmania</i> skin test | [ ]    | __/__/__     |
| 6. PCR                         | [ ]    | __/__/__     |

Type of *Leishmania* (if identified):

1. *tropica*
2. *major*
3. *infantum*
4. Other \_\_\_\_\_

**1. Epidemiologic data**

Have you moved house in the 12 months preceding the diagnosis of the illness?

[1] Yes [2] No [3] Don't know

If you have:

Previous address \_\_\_\_\_

Date of move \_\_\_\_\_

Sites/areas of presumed infection\* (specify precise address and period spent in that place)

Address

Period spent at that place

---



---



---

\* e.g., Near home, on military reserve duty, holidays, sleeping out in the open, sitting on porch or in garden

Were you bitten by an insect other than a mosquito? [1] Yes [2] No [3] Don't know

If yes, describe the insect \_\_\_\_\_

If yes, please fill out the following table:

| Place (precise location and description, e.g., garden, lawn, beach etc.) | Season when bitten                                                                                                                               | How do you know you were bitten?                                                                                                                      | Time of day when bitten                                                                                                                    | Were other people in the same place bitten at the same time?                                                                                    |
|--------------------------------------------------------------------------|--------------------------------------------------------------------------------------------------------------------------------------------------|-------------------------------------------------------------------------------------------------------------------------------------------------------|--------------------------------------------------------------------------------------------------------------------------------------------|-------------------------------------------------------------------------------------------------------------------------------------------------|
|                                                                          | <input type="checkbox"/> Spring<br><input type="checkbox"/> Summer<br><input type="checkbox"/> Fall (Autumn)<br><input type="checkbox"/> Unknown | <input type="checkbox"/> Pricking feeling<br><input type="checkbox"/> Itch<br><input type="checkbox"/> Mark on skin<br><input type="checkbox"/> Other | <input type="checkbox"/> Evening<br><input type="checkbox"/> Night<br><input type="checkbox"/> Morning<br><input type="checkbox"/> Unknown | <input type="checkbox"/> No<br><input type="checkbox"/> Only a few<br><input type="checkbox"/> Most of them<br><input type="checkbox"/> Unknown |
|                                                                          | <input type="checkbox"/> Spring<br><input type="checkbox"/> Summer<br><input type="checkbox"/> Fall (Autumn)<br><input type="checkbox"/> Unknown | <input type="checkbox"/> Pricking feeling<br><input type="checkbox"/> Itch<br><input type="checkbox"/> Mark on skin<br><input type="checkbox"/> Other | <input type="checkbox"/> Evening<br><input type="checkbox"/> Night<br><input type="checkbox"/> Morning<br><input type="checkbox"/> Unknown | <input type="checkbox"/> No<br><input type="checkbox"/> Only a few<br><input type="checkbox"/> Most of them<br><input type="checkbox"/> Unknown |

|  |                                                                                                                                                  |                                                                                                                                                       |                                                                                                                                            |                                                                                                                                                 |
|--|--------------------------------------------------------------------------------------------------------------------------------------------------|-------------------------------------------------------------------------------------------------------------------------------------------------------|--------------------------------------------------------------------------------------------------------------------------------------------|-------------------------------------------------------------------------------------------------------------------------------------------------|
|  |                                                                                                                                                  |                                                                                                                                                       |                                                                                                                                            |                                                                                                                                                 |
|  | <input type="checkbox"/> Spring<br><input type="checkbox"/> Summer<br><input type="checkbox"/> Fall (Autumn)<br><input type="checkbox"/> Unknown | <input type="checkbox"/> Pricking feeling<br><input type="checkbox"/> Itch<br><input type="checkbox"/> Mark on skin<br><input type="checkbox"/> Other | <input type="checkbox"/> Evening<br><input type="checkbox"/> Night<br><input type="checkbox"/> Morning<br><input type="checkbox"/> Unknown | <input type="checkbox"/> No<br><input type="checkbox"/> Only a few<br><input type="checkbox"/> Most of them<br><input type="checkbox"/> Unknown |

Do you use personal protective measures against mosquito, sandfly, or other insect bites?

| Fans                               | Insect repellent on skin (in the home) | Insect repellent on skin (outside the home) | Vaporizing tablets or liquid       | Repellent candles or coils         | Spraying within the house          | Spraying outside the house         | Other                              |
|------------------------------------|----------------------------------------|---------------------------------------------|------------------------------------|------------------------------------|------------------------------------|------------------------------------|------------------------------------|
| <input type="checkbox"/> Yes       | <input type="checkbox"/> Yes           | <input type="checkbox"/> Yes                | <input type="checkbox"/> Yes       | <input type="checkbox"/> Yes       | <input type="checkbox"/> Yes       | <input type="checkbox"/> Yes       | <input type="checkbox"/> Yes       |
| <input type="checkbox"/> No        | <input type="checkbox"/> No            | <input type="checkbox"/> No                 | <input type="checkbox"/> No        | <input type="checkbox"/> No        | <input type="checkbox"/> No        | <input type="checkbox"/> No        | <input type="checkbox"/> No        |
| <input type="checkbox"/> Sometimes | <input type="checkbox"/> Sometimes     | <input type="checkbox"/> Sometimes          | <input type="checkbox"/> Sometimes | <input type="checkbox"/> Sometimes | <input type="checkbox"/> Sometimes | <input type="checkbox"/> Sometimes | <input type="checkbox"/> Sometimes |

Are there screens on the windows and doors in your home? [1] Yes [2] Partial [3] No

If yes, are they intact and in good condition? [1] Yes [2] No

Does your home have a private garden? [1] Yes [2] No [3] Don't know

Is there a public park near your home? [1] Yes [2] No [3] Don't know

Do you tend to spend time outdoors: in the garden, near your home, in the neighborhood? [1] Yes [2] No [3] Don't know

During what hours of the day? [1] Morning [2] Afternoon [3] Evening [4] After sunset or at night

Information on other family members, relatives, community members, hiking companions etc. who visited or were together with the infected person in the above places, and developed cutaneous leishmaniasis

| Name | Sex | Age | Relationship | Address | Date disease onset |
|------|-----|-----|--------------|---------|--------------------|
|      |     |     |              |         |                    |
|      |     |     |              |         |                    |
|      |     |     |              |         |                    |

Do you consent to the information obtained from this interview being given to inspectors from the Environmental Protection Department?

Yes/No

If yes, please sign here \_\_\_\_\_

If the consent was by telephone, please state.

Name of interviewer \_\_\_\_\_

Position \_\_\_\_\_
